# Supplementary material for: Graphene oxide as a 2D platform for complexation and intracellular delivery of siRNA
Source: Royal Society of Chemistry journal article supplement (doi:10.1039/c9nr02301a), 2019-01-01
Supplement: c9nr02301a1.pdf [file c9nr02301a1.pdf]

## Supplementary Information

# Graphene Oxide as 2D Platform for Complexation and Intracellular Delivery of siRNA

Irene de Lázaro<sup>1,2,§</sup>, Sandra Vranic<sup>1,2</sup>, Domenico Marson<sup>3</sup>, Artur Filipe Rodrigues<sup>1,2</sup>, Maurizio Buggio<sup>1,2</sup>, Adrián Esteban-Arranz<sup>1,2</sup>, Mariarosa Mazza<sup>1,2</sup>, Paola Posocco<sup>3</sup> and Kostas Kostarelos<sup>1,2,\*</sup>

<sup>1</sup>*Nanomedicine Lab, Faculty Biology, Medicine and Health, AV Hill Building, The University of Manchester, Manchester M13 9PT, United Kingdom*

<sup>2</sup>*National Graphene Institute, The University of Manchester, Booth Street E, Manchester M13 9PL, United Kingdom*

<sup>3</sup>*Molecular Simulation Engineering Laboratory, Department of Engineering and Architecture, University of Trieste, 34127 Trieste, Italy*

---

<sup>§</sup> Current address: John A. Paulson Harvard School of Engineering and Applied Sciences (SEAS), 58 Oxford Street, Cambridge, 02138 MA, USA & Wyss Institute for Biologically Inspired Engineering at Harvard University, 3 Blackfan Circle, Boston, MA 02115, USA

\* Correspondence should be addressed to: [kostas.kostarelos@manchester.ac.uk](mailto:kostas.kostarelos@manchester.ac.uk)

## Supporting Figure 1

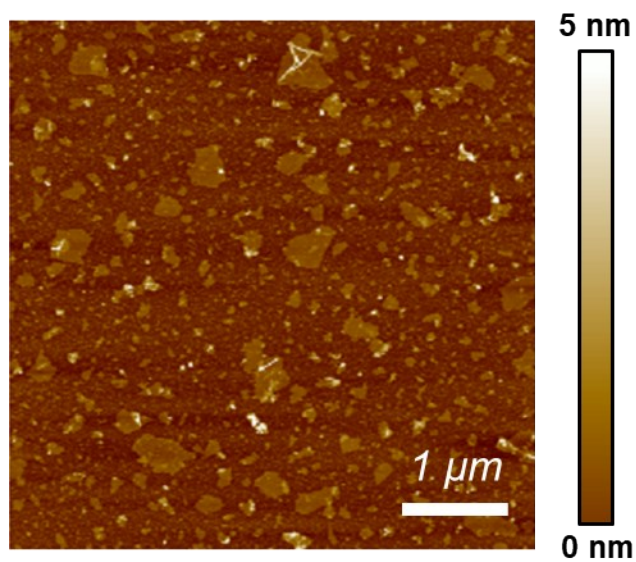

**Figure S1. AFM image of GO flakes.** AFM analysis indicated a distribution of GO flakes with lateral dimensions in the 0.05 – 0.5 μm range and thickness within  $1.4 \pm 0.5$  nm, equivalent to 1-2 layers of GO.

## Supporting Figure 2

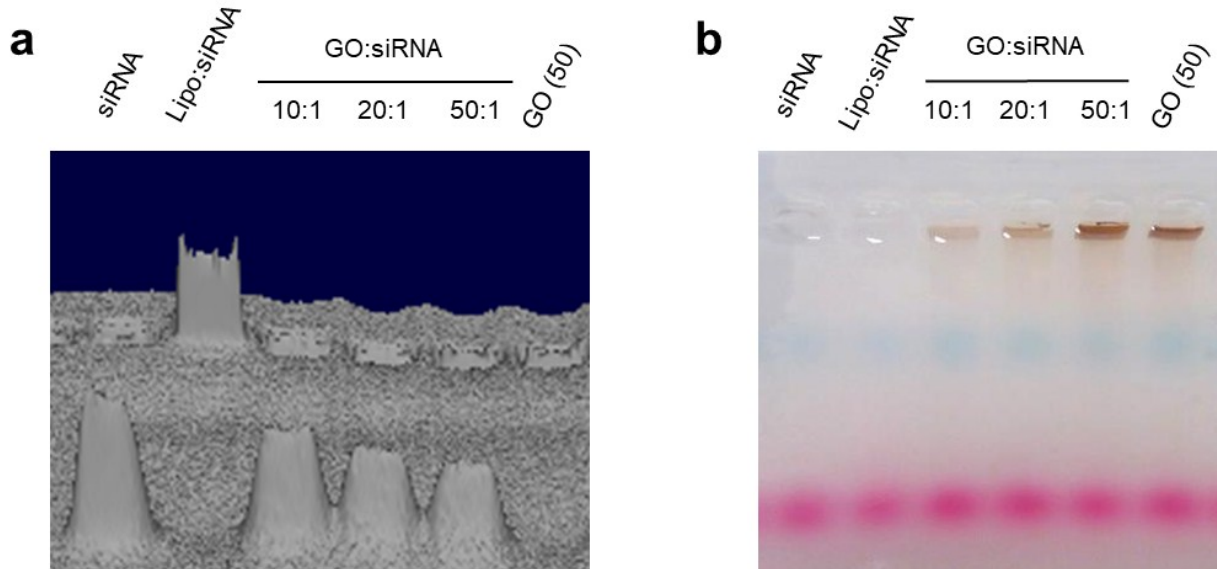

**Figure S2. Supplementary data to gel retardation assay. (a)** Intensity of siRNA bands detected upon gel electrophoresis of free siRNA, lipo:siRNA complexes, GO:siRNA complexes and GO alone. **(b)** An image of the same gel shows that GO is retained in the wells. Note that both images correspond to the same gel shown in Figure 1a.

### Supporting Figure 3

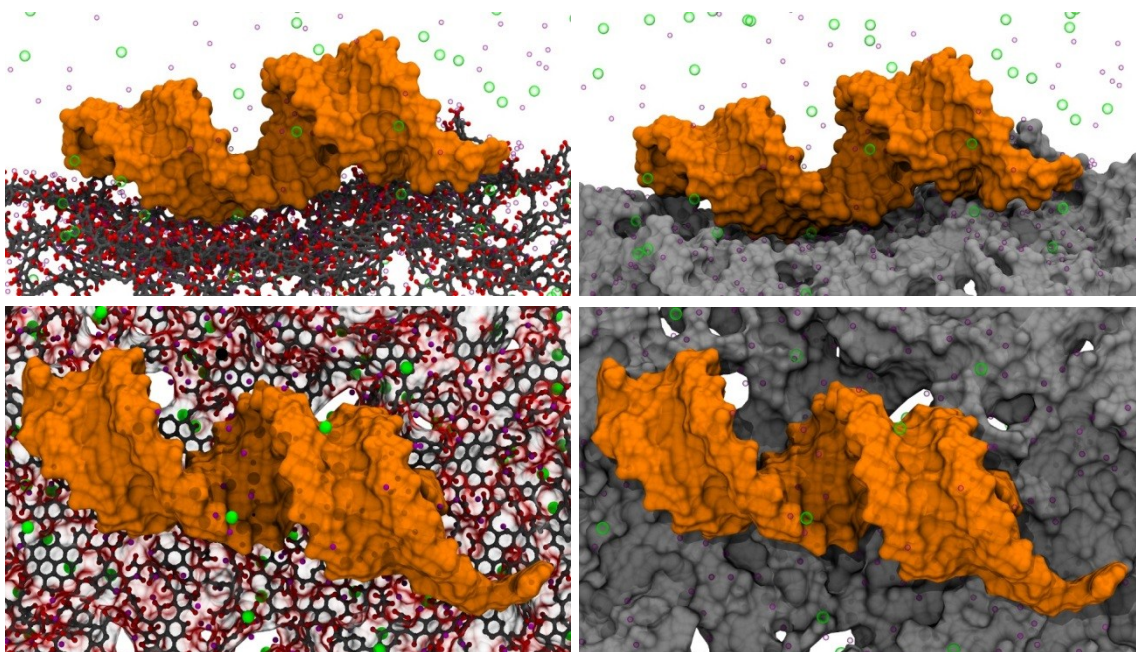

**Figure S3. GO:siRNA binding by MD simulation.** Snapshots extracted from MD calculation of siRNA (represented as an orange shaded surface) in complex with a GO sheet at 200 mM NaCl ionic strength (top panels, lateral view; bottom panels, top view). In the left panels, the chemical structure of GO is explicitly represented with carbon and oxygen atoms colored in grey and red, respectively. In the right panels, we depicted the GO sheet as a grey surface to highlight 3D features. To preserve clarity, water is not shown and Na<sup>+</sup> and Cl<sup>-</sup> ions are visualized as purple and green spheres, respectively.

## Supporting Figure 4

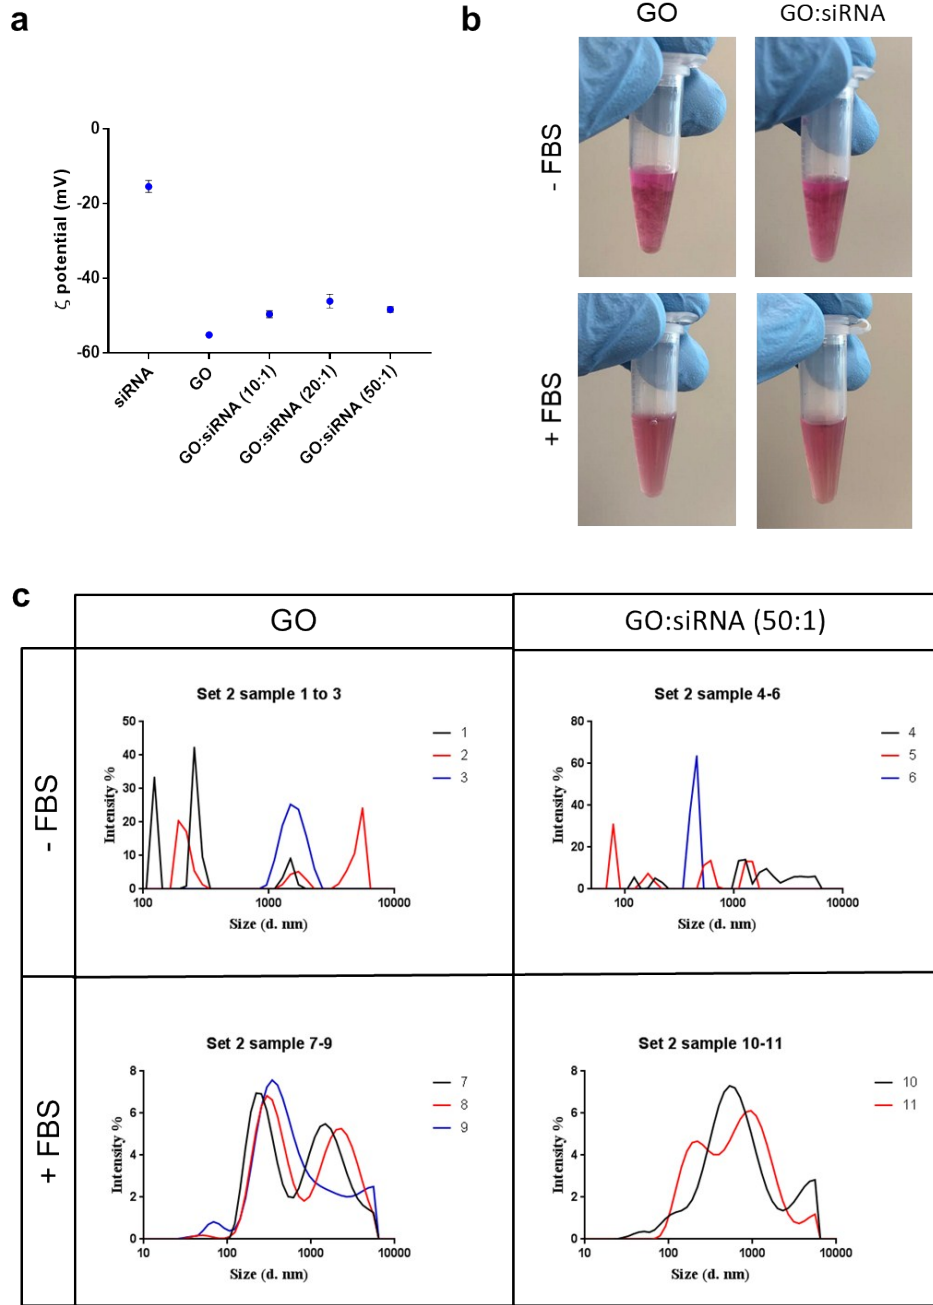

**Figure S4. Colloidal stability of GO and GO:siRNA complexes in water and cell culture medium. (a)** Z potential measurements of siRNA, GO and GO:siRNA complexes. **(b)** Images of GO and GO:siRNA (50:1) after 4 h incubation in DMEM cell culture medium, in the presence or absence of FBS. **(c)** Size distribution of GO and GO:siRNA (50:1) complexes upon 4 h incubation in cell culture medium measured by DLS.

## Supporting Figure 5

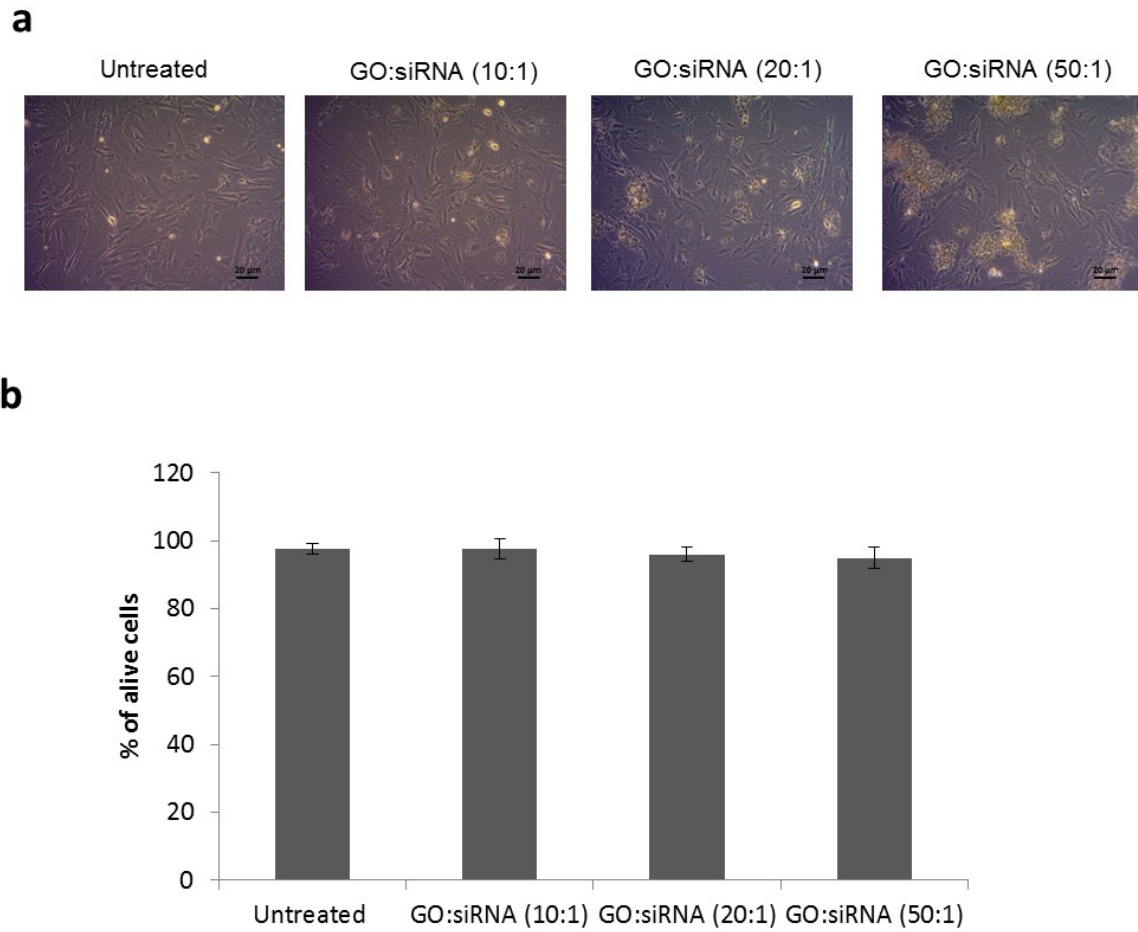

**Figure S5. Effects of GO:siRNA transfection on cell viability. (a)** Optical microscopy images of MEF exposed to GO:siRNA complexes for 24 h. **(b)** Cell viability assessed by flow cytometry (AnnexinV/PI staining).

## Supporting Figure 6

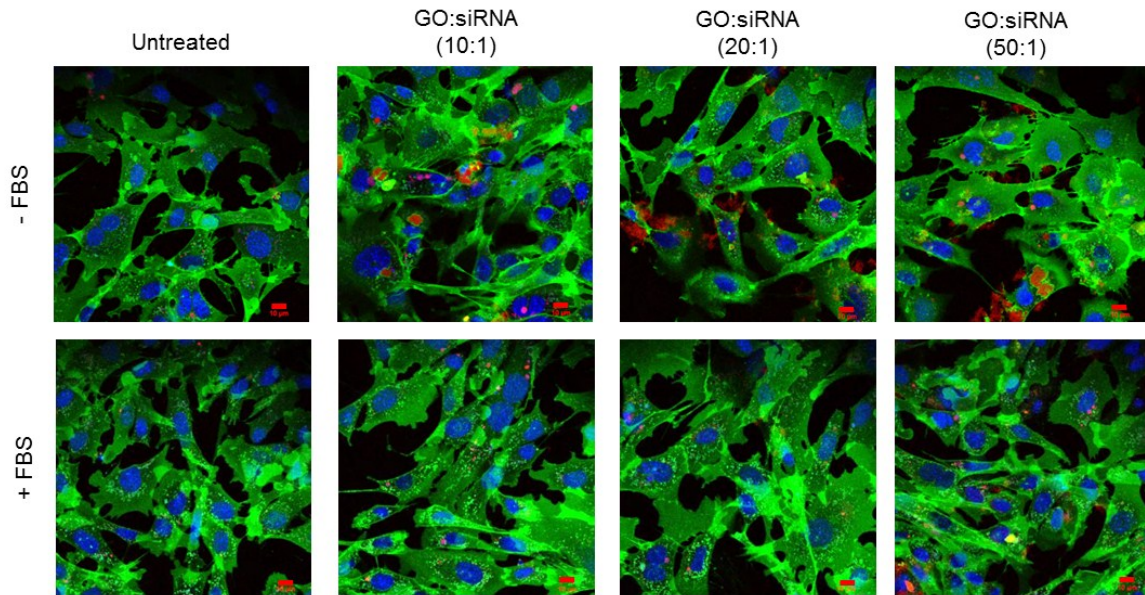

**Figure S6. Uptake of GO:siRNA complexes in the presence of absence of serum proteins.** GO uptake in MEFs was visualized by confocal microscopy, thanks to the intrinsic fluorescence of the material, 24 h after exposure. The upper panel represents serum-free treatment conditions, while the lower panel shows that the presence of 15% FBS in the medium significantly impaired GO uptake. Green – Cell Membrane Mask, Red – GO, Blue – nucleus (Hoechst). Scale bar shows 10  $\mu\text{m}$ .

## Supporting Figure 7

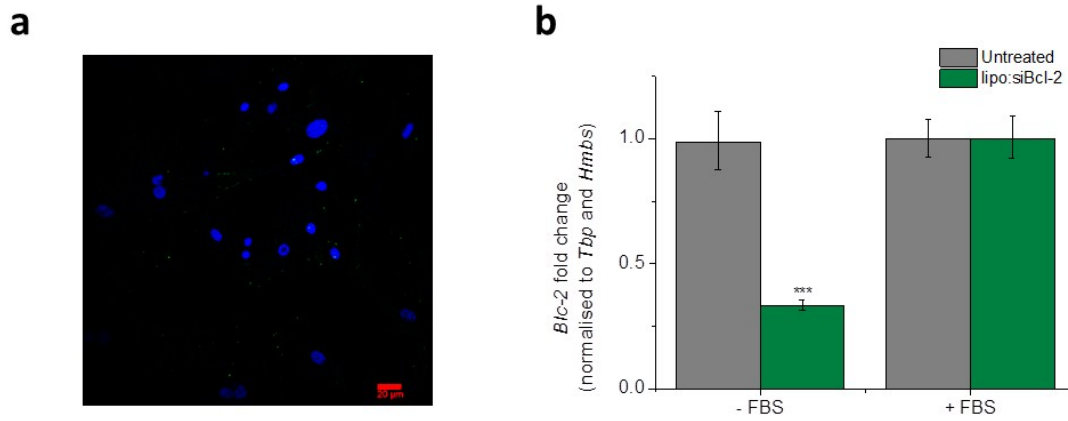

**Figure S7. FBS blocks siRNA delivery with lipo:siRNA complexes. (a)** Confocal microscopy of MEFs, 4 h after transfection with lipo:siGLO in the presence of FBS, indicated absence of siRNA intracellular delivery. Scale bar shows 20  $\mu$ m. **(b)** Analysis of *Bcl-2* mRNA levels by RT-qPCR 24 h after transfection with lipo:siBcl-2 in the presence or absence of FBS confirms the absence of target downregulation in the presence of serum proteins (\*\*\*) $p < 0.001$ , one-way ANOVA and Tukey post-hoc test,  $n=3$ ).



## Supporting Figure 8

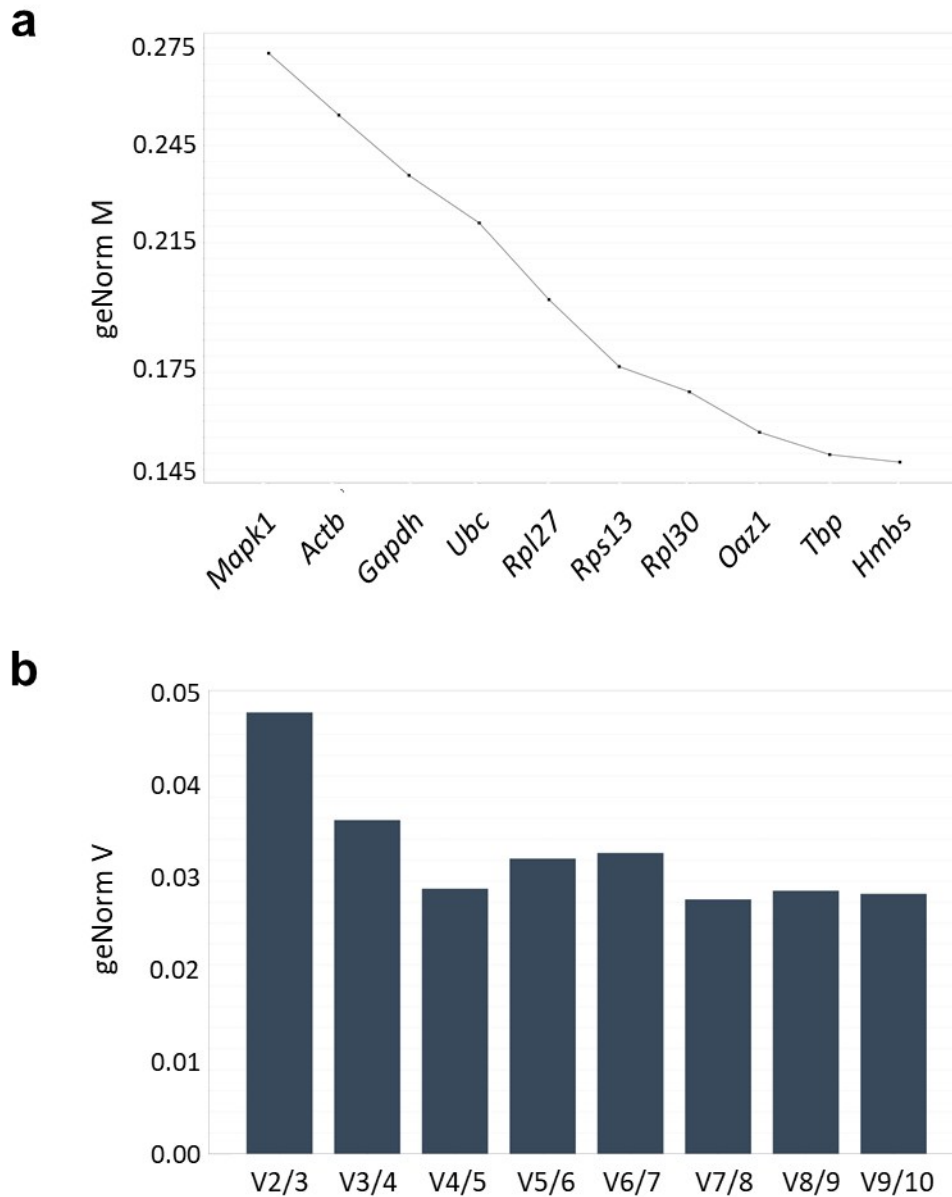

**Figure S8. Analysis of reference gene expression stability upon transfection with GO:siRNA vectors.** Expression of ten candidate reference genes was analyzed by RT-qPCR and GeNorm software. **(a)** Stability values for each candidate reference gene (GeNorm M). **(b)** Pair-wise comparison of all reference genes indicated that two genes should be included as reference for reliable normalization of gene expression data (GeNorm V).

## Supporting Figure 9

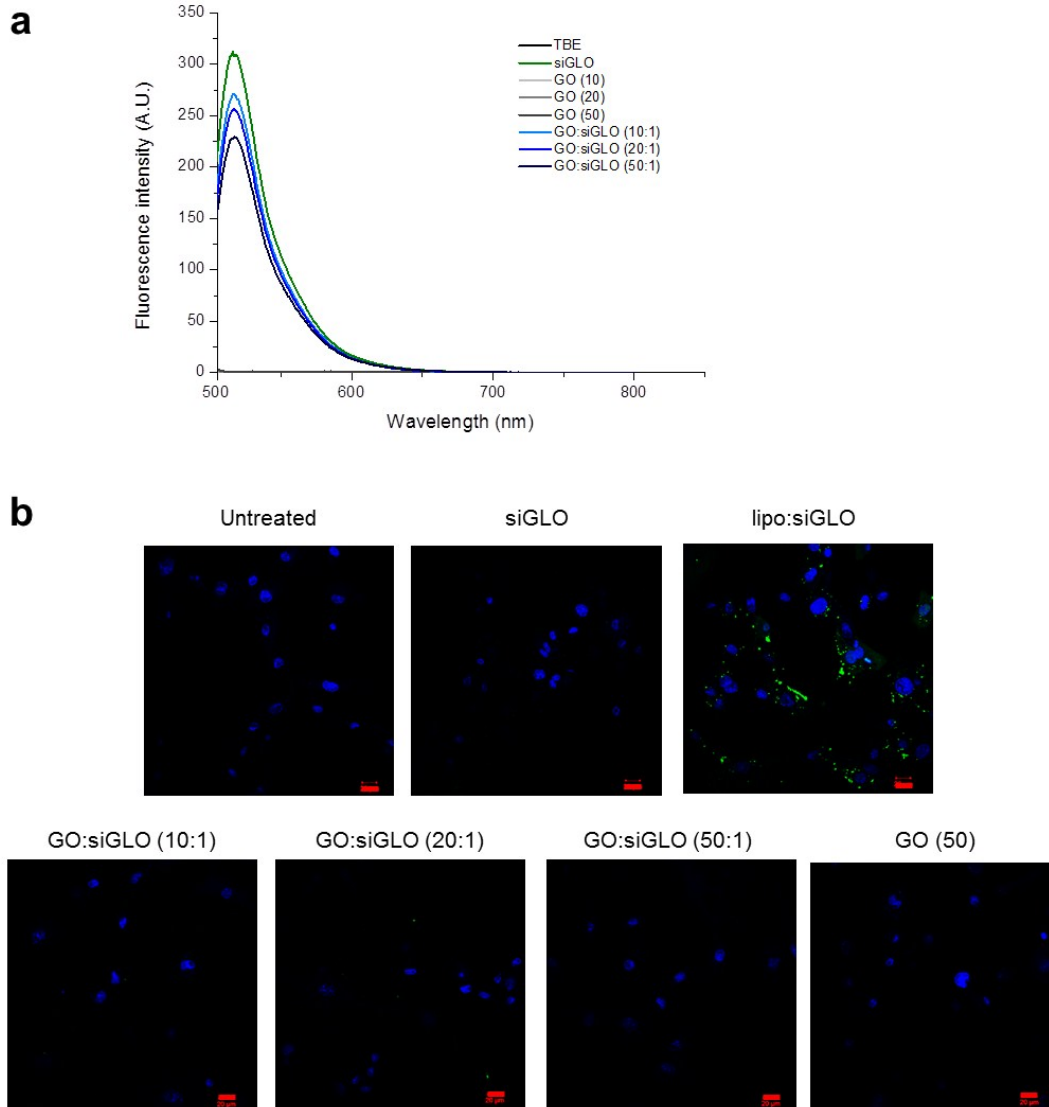

**Figure S9. Complexation and intracellular delivery of a nuclear-targeted, fluorescently labelled siRNA (siGLO).** (a) GO:siGLO complexation was confirmed by a decrease in fluorescence signal with increasing GO:siRNA mass ratios. (b) 24 h after transfection, most of the signal had disappeared from the lipo:siGLO condition. No signal was detected in GO:siGLO condition. Green – 6-FAM labelling, siGLO oligonucleotide, Blue – nucleus (Hoechst). Scale bar shows 20  $\mu$ m.

## Supporting Figure 10

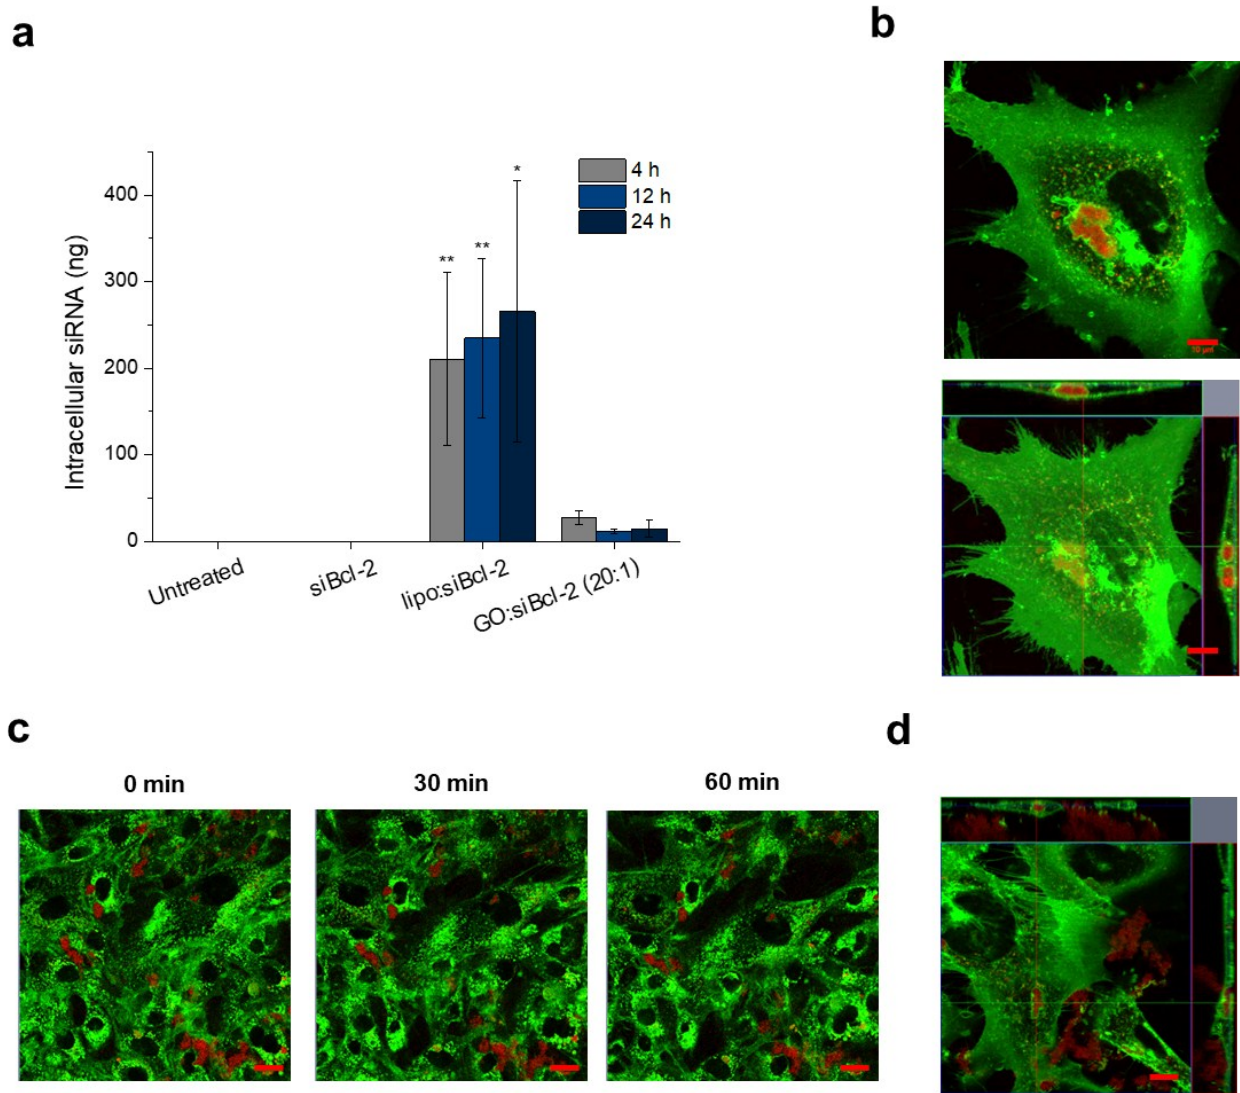

**Figure S10. Quantification of intracellularly delivered siRNA in 4T1 cells.** (a) A PCR-based method was used to determine the amount of siRNA successfully internalised in 4T1 cells 4, 12 and 24 h after transfection with GO:siBcl-2 complexes. (\* $p < 0.05$  and \*\* $p < 0.001$ , one-way ANOVA and Tukey post-hoc test,  $n = 3$ ). (b) Vesicular entrapment of GO:siRNA complex already after 6 h of treatment. Left panel represents a section in the middle of the cell, while right panel shows orthogonal projection of the vesicular region. Green – Cell Membrane Mask, Red – GO. Scale bar shows 10  $\mu\text{m}$ . (c) Captures of the video taken within an hour difference (0, 30 and 60 min) after 24 h of treatment (using GO:siRNA at 50:1 mass ratio) show that the vesicle moves with the cell but is not further trafficked. Green – Cell Membrane Mask, Red – GO. Scale bar shows 20  $\mu\text{m}$ . (d) Cells treated with uncoated GO (i.e. in the absence of siRNA), in a concentration equivalent to that of the 50:1 mass ratio, for 4 h. Green – Cell Membrane Mask, Red – GO. Scale bar shows 10  $\mu\text{m}$ .

## Supporting Table 1

|                                                                                | <i>Technique</i>                                          | <i>Results</i>                                         |
|--------------------------------------------------------------------------------|-----------------------------------------------------------|--------------------------------------------------------|
| <b>Lateral dimensions*</b>                                                     | <i>AFM</i>                                                | 0.050 – 0.5 $\mu\text{m}$                              |
|                                                                                | <i>TEM</i>                                                | 0.1 – 2 $\mu\text{m}$                                  |
| <b>Thickness*</b>                                                              | <i>AFM</i>                                                | 1.4 $\pm$ 0.5 nm (1-2 layers)                          |
| <b>Optical Properties</b>                                                      | <i>Absorbance</i><br>( $\lambda = 230$ nm)                | $A = 0.050 * C_{\text{GO}}$ ( $\mu\text{g/mL}$ )       |
|                                                                                | <i>Fluorescence</i><br>( $\lambda_{\text{exc}} = 525$ nm) | $F_{600} = 0.823 * C_{\text{GO}}$ ( $\mu\text{g/mL}$ ) |
| <b>Degree of defects (<math>I_D/I_G</math>)</b>                                | <i>Raman spectroscopy</i>                                 | 1.36 $\pm$ 0.03                                        |
| <b>Surface charge</b>                                                          | $\zeta$ -potential                                        | -55.9 $\pm$ 1.4 mV                                     |
| <b>Functionalisation degree</b>                                                | <i>TGA</i>                                                | 41%                                                    |
| <b>Chemical composition (Purity)</b>                                           | <i>XPS</i>                                                | C: 67.6%, O: 32.2%, (99.8%)<br>S: 0.2%                 |
| <b>C:O ratio</b>                                                               | <i>XPS</i>                                                | 2.1                                                    |
| <b><math>\pi</math>-<math>\pi</math>, O=C-O, C=O,<br/>C-O-C, C-C &amp; C=C</b> | <i>XPS</i>                                                | 3.0%, 15.3%, 31.2%,<br>11.3%, 39.2%                    |

**Table S1. Physicochemical characteristics of GO used in this study.** \*Lateral dimensions and thickness are reported as a range between the minimum and maximum sizes detected. Full characterization of the material is provided in Mukherjee et al<sup>15</sup>. This Table has been adapted from the original publication.

## Supporting Table 2

**Table S2.** Primer sequences used in the reference gene stability study.

| <i>Gene symbol</i>  | <i>Gene name</i>                         | <i>Gene ID</i> | <i>Accession number (mRNA)</i>                  | <i>Cell function</i> | <i>Fwd Seq</i>         | <i>Tm</i> | <i>Rv seq</i>           | <i>Tm</i> | <i>Amplicon size</i> |
|---------------------|------------------------------------------|----------------|-------------------------------------------------|----------------------|------------------------|-----------|-------------------------|-----------|----------------------|
| <b><i>Rps13</i></b> | Ribosomal protein S13                    | 68052          | NM_026533.3                                     | Translation          | CCCAGGTCCGTTTTGTGACT   | 60        | TCCTCTCAAGGTGCTTTCGG    | 60        | 132                  |
| <b><i>Rpl27</i></b> | Ribosomal protein L27                    | 19942          | NM_011289.3                                     | Translation          | CAAAAACGCAGTGCCCGA     | 59        | CTTACGGAGAGGTGGCTTCA    | 59        | 120                  |
| <b><i>Rpl30</i></b> | Ribosomal protein L30                    | 19946          | NM_009083.4<br>NM_001163485.1                   | Translation          | GAAGAGCTTTGCATTGTGGGAG | 60        | CCATCTCCTGCCTTAGGTGC    | 61        | 102                  |
| <b><i>OAZ1</i></b>  | Ornithine decarboxylase antizyme 1       | 18245          | NM_008753.4<br>NM_001301034.1                   | Metabolism           | GGGTTGCCCTTAATTGCTGT   | 59        | TCTTGTCGTTAGACGTCGGC    | 60        | 187                  |
| <b><i>Actb</i></b>  | $\beta$ -actin                           | 11461          | NM_007393.5                                     | Structural           | CTGAGCTGCGTTTTACACCC   | 59        | CGCCTTCACCGTCCAGTTT     | 61        | 200                  |
| <b><i>Gapdh</i></b> | glyceraldehyde-3 phosphate dehydrogenase | 14433          | NM_001289726.1<br>NM_008084.3<br>XM_017321385.1 | Metabolism           | AGGTCGGTGTGAACGGATTG   | 61        | TGTAGACCATGTAGTTGAGGTCA | 59        | 123                  |
| <b><i>Mapk1</i></b> | mitogen-activated protein kinase 1       | 26413          | NM_011949.3<br>NM_001038663.1<br>XM_006522147.3 | Signalling           | GGTTGTTCCCAAATGCTGACT  | 59        | CAACTTCAATCCTCTTGAGGG   | 59        | 84                   |
| <b><i>Ubc</i></b>   | Ubiquitin C                              | 22190          | NM_019639.4                                     | Metabolism           | CAAACAGGAAGACAGACGTACC | 59        | CCCATCACACCCAAGAACAAG   | 59        | 80                   |
| <b><i>Hmbs</i></b>  | Hydroxymethylbilane synthase             | 15288          | NM_013551.2<br>NM_001110251.1                   | Metabolism           | ATCTTGGACCTAGTGAGTGTGT | 58        | GTACAGTTGCCCATCTTTCATCA | 59        | 141                  |
| <b><i>Tbp</i></b>   | TATA-box binding protein                 | 21374          | NM_013684.3                                     | Transcription        | TTTGGCTAGGTTTCTGCGGT   | 60        | GCCCTGAGCATAAGGTGGAA    | 60        | 195                  |

## Snapshot from Supporting Video 1

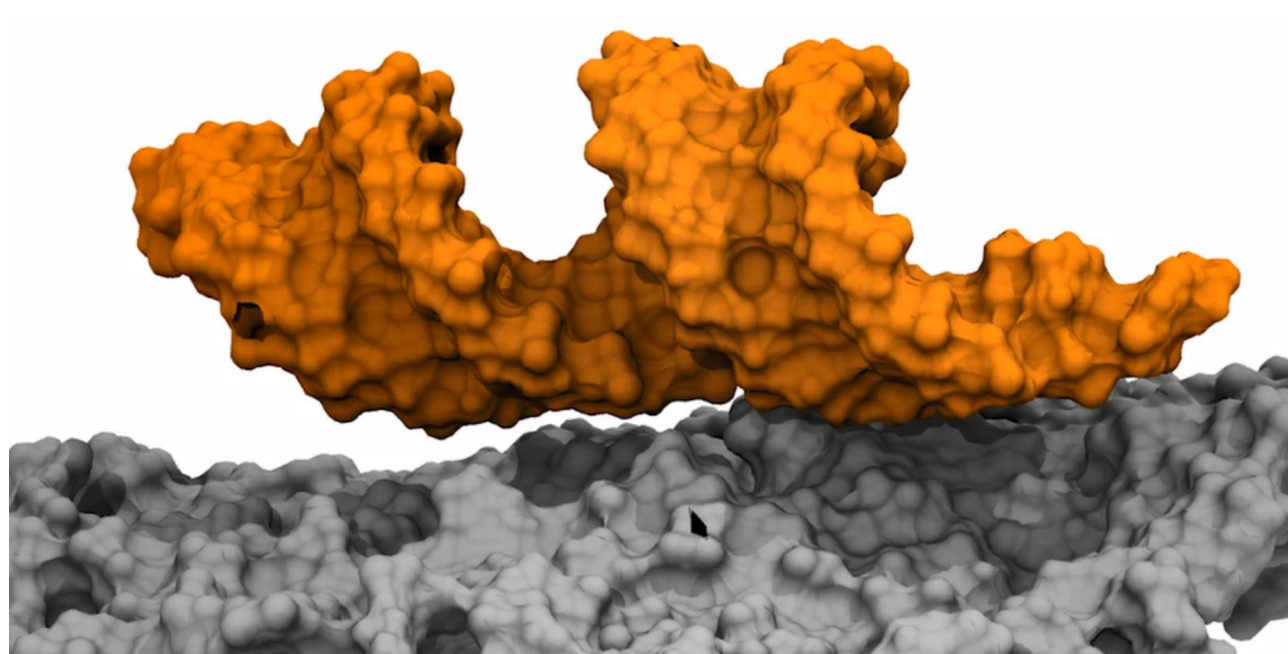

**Video S1. GO:siRNA binding by MD simulation without complementary salts.** Movie extracted from MD simulation of GO complexing siRNA in aqueous solution at 0 nM NaCl ionic strength.

## Snapshot from Supporting Video 2

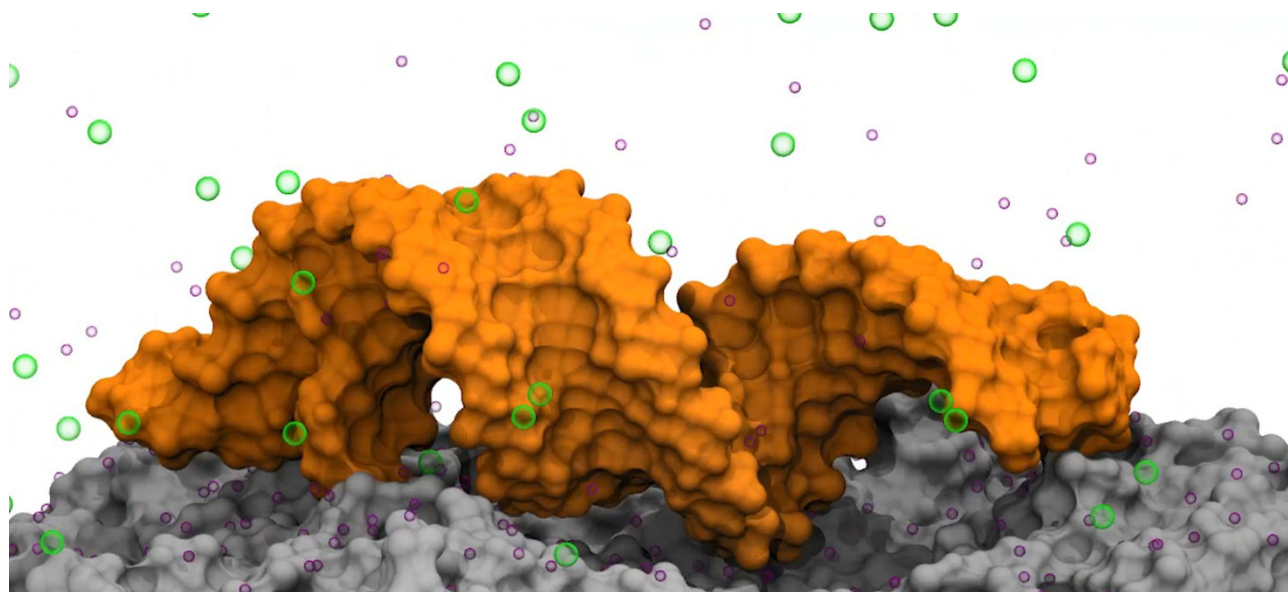

**Video S2. GO:siRNA binding by MD simulation at 150 mM NaCl.** Movie extracted from MD simulation of GO complexing siRNA in aqueous solution at 150 mM NaCl ionic strength.

### Snapshot from Supporting Video 3

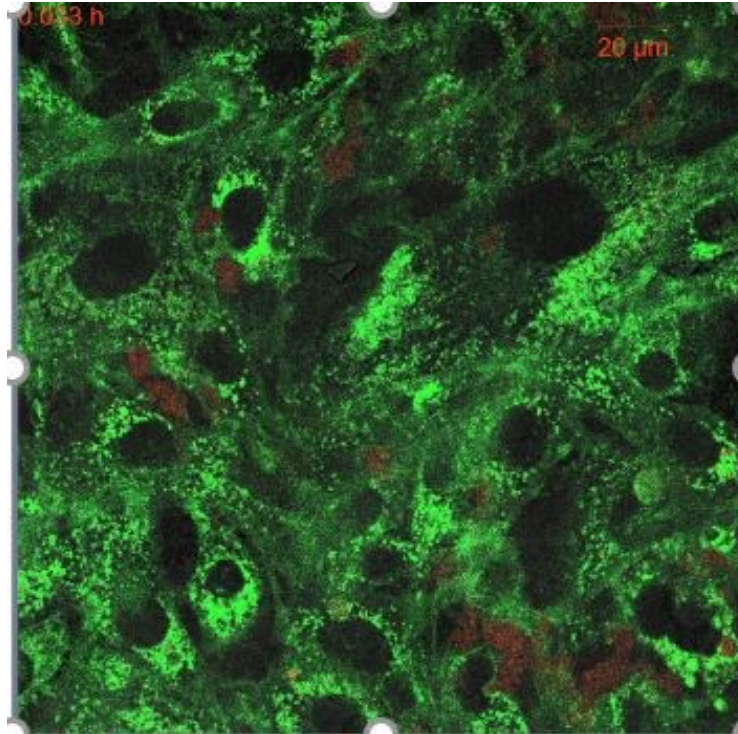

**Video S3. Intracellular fate of GO:siRNA complexes.** An intracellular vesicle containing GO was followed for 1 h, 24 h after transfection with GO:siRNA (50:1). Staining of the cells is as follows: Green – Cell Membrane Mask, Red – GO.
